# Supplementary material for: Preliminary Experience with a New Robotic Technique to Facilitate Distal Pancreatectomy with Spleen Preservation: Left Lateral Approach in Right Lateral Decubitus Position
Source: Research Square preprint supplement (doi:10.21203/rs.3.rs-2269396/v1), 2022-11-18
Supplement: Supplementary file 1 [file 96665b11d9558aa688f61949.docx]

Table 1. Demographic, clinicopathologic characteristics and intra/post-operative outcomes.

| Variables | Case 1 | Case 2 | Case 3 | Case 4 | Case 5 | median (IQR) |
| --- | --- | --- | --- | --- | --- | --- |
| **Age** | 38 | 53 | 54 | 52 | 70 | 53.4  (38-70) |
| **Sex** | Female | Female | Male | Male | Female |  |
| **BMI** (Kg/m2) | 36 | 34 | 33 | 31 | 23 | 31.4  (23-36) |
| **ASA** | 3 | 2 | 2 | 1 | 2 |  |
| **Location of the lesion** | tail | tail | tail | body/tail | body |  |
| **Pre-operative diagnosis** | Solid pseudopapillary tumor | Mucinous cystadenoma | Solid pancreatic tumor* | IPMN | IPMN |  |
| **Preoperative EUS and Biopsy** | no | no | yes | yes | yes |  |
| **Splenic vessels preservation** | yes | yes | yes | no  (Warshaw technique) | yes |  |
| **Successful spleen preservation** | yes | yes | yes | yes | yes |  |
| **EBL (mL)** | 300 | 200 | 300 | 300 | 100 | 275  (200-300) |
| **Transfusion** | no | no | no | no | no |  |
| **Conversion to open or laparoscopic procedure** | no | no | no | no | no |  |
| **Total operating time (min)** | 380 | 325 | 320 | 300 | 290 | 342  (320-380) |
| **POPF and grade** | no | BL | no | BL | no |  |
| **Post-operative morbidity grade**** | 0 | I | 0 | I | 0 |  |
| **CCI** | 0 | 0 | 0 | 0 | 0 | 0 |
| **Post-operative mortality** | no | no | no | no | no | 0 |
| **LoH (days)** | 5 | 6 | 7 | 6 | 6 | 6  (5-7) |
| **Histologic diagnosis** | Solid pseudopapillary tumor | Serous cystadenoma | Chronic pancreatitis | pNET +  pseudocyst | mixed-type IPMN |  |
| **Tumour size (mm)** | 55 | 32 | 12 | 15+40 | 25 | 37.8  (12-65) |
| **Resection margins status** | Free | Free | Free | Free | Free |  |

Patients are in chronological order of the date of the operation

BMI: Body mass index, ASA: American Society of Anaesthesiologists, IPMN: Intraductal Papillary Mucinous Neoplasm, EUS: Endoscopic Ultrasonography, EBL: Estimated Blood Loss,

POPF: postoperative pancreatic fistula, defined according to the International Study Group of Pancreatic Fistula (ISGPF) classification, BL: Biochemical leak (“grade A” POPF, is not considered a true pancreatic fistula or an actual complication). CCI: Comprehensive Complication Index, LoH: Length of hospitalization, pNET: pancreatic Neuroendocrine Tumor, IQR: inter-quartile range

*Indeterminate tumor with growth during follow-up

**Clavien-Dindo Classification
